# Supplementary material for: Geochemical speciation, pollution assessment, and source identification of heavy metals in sediment cores of the Cau River basin, Hai Duong province, Vietnam
Source: Royal Society of Chemistry journal article supplement (doi:10.1039/d4va00325j), 2025-01-01
Supplement: d4va00325j1.pdf [file d4va00325j1.pdf]

## SUPPLEMENTARY INFORMATION

# Geochemical speciation, pollution assessment, and source identification of heavy metals in sediment cores of Cau River basin, Hai Duong province, Vietnam

**Ba Lich Pham<sup>1,†,\*</sup>, Huy Thong Vu<sup>1,2</sup>, Van Linh Nguyen<sup>1</sup>, Thi Kim Thuong Nguyen<sup>1</sup>, Anh Duc Trinh<sup>3</sup> and Thi Thao Ta<sup>1\*</sup>**

<sup>1</sup>Department of Analytical Chemistry, Faculty of Chemistry, VNU University of Science, 19 Le Thanh Tong, Hanoi 100000, Vietnam

<sup>2</sup>Fundamental Sciences Department, University of Fire Fighting and Prevention, Hanoi 100000, Vietnam

<sup>3</sup>Nuclear Training Center, Vietnam Atomic Energy Institute, 140 Nguyen Tuan, Thanh Xuan, Hanoi 100000, Vietnam

†Present address: Institut de Chimie Physique, Université Paris-Saclay, CNRS, UMR8000, 91405 Orsay

Email:

Ba Lich Pham: [phambalichls@gmail.com](mailto:phambalichls@gmail.com)

Thi Thao Ta: [tathithao@hus.edu.vn](mailto:tathithao@hus.edu.vn)

**Number of pages: 8**

**Number of tables: 5**

**Number of figures: 2**

Upon request, we provide the data used to support the findings of this research project as follows. The fractionation analyses and ecological risk evaluations are based on the contents of heavy metals in each geochemical phase in the sediment depth of 10 cm, 20 cm, 30 cm, and 40 cm, presented explicitly in Tables S1, S2, S3, and S4, respectively. The values of heavy metals concentration in pore water samples in order to investigate the sediment-water transfer rates are indicated in Table S5. All figures less than 10 are presented with 3 decimal places. Otherwise, they are given with 4 significant digits.

**Table S1.** Contents of heavy metals in the sediment depth of 10 cm ( $\mu\text{g}\cdot\text{g}^{-1}$ )

| Sampling site | Fraction     | Cu    | Pb    | Cd    | Zn    | Fe    | Co    | Ni    | Mn    | Cr    |
|---------------|--------------|-------|-------|-------|-------|-------|-------|-------|-------|-------|
| S5            | Exchangeable | 0.186 | 0.014 | 0.053 | 0.254 | 9.437 | 0.038 | 0.088 | 79.16 | 0.005 |
|               | Carbonate    | 2.043 | 3.532 | 0.114 | 5.877 | 754.1 | 0.952 | 0.778 | 158.7 | 0.434 |
|               | Fe-Mn oxide  | 1.115 | 6.649 | 0.026 | 5.082 | 2694  | 1.054 | 0.799 | 120.2 | 0.817 |
|               | Organic      | 5.211 | 11.52 | 0.031 | 3.215 | 1855  | 0.542 | 0.624 | 46.15 | 1.047 |
|               | Residual     | 0.800 | 1.673 | 0.014 | 2.987 | 1138  | 0.368 | 1.284 | 7.396 | 3.533 |
|               | Non-residual | 8.555 | 21.72 | 0.224 | 14.43 | 5312  | 2.587 | 2.289 | 404.2 | 2.303 |
|               | Total        | 9.356 | 23.39 | 0.238 | 17.41 | 6450  | 2.955 | 3.572 | 411.6 | 5.836 |
|               | ICF          | 10.69 | 12.98 | 16.05 | 4.830 | 4.667 | 7.023 | 1.783 | 54.65 | 0.652 |
| S11           | Exchangeable | 0.035 | 0.084 | 0.027 | 0.973 | 8.958 | 0.285 | 0.383 | 101.1 | 0.030 |
|               | Carbonate    | 0.266 | 0.611 | 0.022 | 2.052 | 80.72 | 0.624 | 0.588 | 31.58 | 0.243 |
|               | Fe-Mn oxide  | 0.221 | 1.716 | 0.009 | 3.105 | 1638  | 0.593 | 0.733 | 36.07 | 0.896 |
|               | Organic      | 4.233 | 4.780 | 0.018 | 2.038 | 1609  | 0.371 | 0.655 | 14.17 | 1.033 |
|               | Residual     | 0.682 | 1.861 | 0.021 | 2.181 | 1039  | 0.294 | 0.975 | 5.165 | 3.167 |
|               | Non-residual | 4.755 | 7.190 | 0.076 | 8.168 | 3337  | 1.873 | 2.359 | 182.9 | 2.202 |
|               | Total        | 5.437 | 9.051 | 0.096 | 10.35 | 4376  | 2.167 | 3.334 | 188.1 | 5.370 |
|               | ICF          | 6.970 | 3.864 | 3.646 | 3.746 | 3.211 | 6.377 | 2.420 | 35.42 | 0.695 |
| S15           | Exchangeable | 0.026 | 0.145 | 0.039 | 1.027 | 3.442 | 1.216 | 0.439 | 143.8 | 0.006 |
|               | Carbonate    | 0.209 | 0.782 | 0.026 | 1.886 | 152.3 | 1.686 | 1.145 | 58.44 | 0.333 |
|               | Fe-Mn oxide  | 0.102 | 1.064 | 0.008 | 2.590 | 1299  | 0.805 | 0.823 | 80.19 | 0.639 |
|               | Organic      | 2.590 | 3.151 | 0.013 | 2.209 | 1311  | 0.521 | 0.732 | 33.34 | 0.756 |
|               | Residual     | 0.693 | 2.518 | 0.048 | 34.95 | 831.8 | 0.243 | 0.651 | 5.008 | 2.115 |
|               | Non-residual | 2.927 | 5.143 | 0.086 | 7.711 | 2765  | 4.228 | 3.139 | 315.7 | 1.735 |
|               | Total        | 3.619 | 7.661 | 0.133 | 42.66 | 3597  | 4.471 | 3.790 | 320.8 | 3.849 |
|               | ICF          | 4.225 | 2.042 | 1.795 | 0.221 | 3.325 | 17.40 | 4.819 | 63.04 | 0.820 |
| S22           | Exchangeable | 3.592 | 0.317 | 0.101 | 0.889 | 27.92 | 0.035 | 0.169 | 61.51 | 0.029 |
|               | Carbonate    | 16.48 | 25.02 | 0.172 | 10.65 | 922.9 | 1.144 | 0.985 | 250.2 | 0.440 |
|               | Fe-Mn oxide  | 2.753 | 5.181 | 0.009 | 4.660 | 657.3 | 0.458 | 0.432 | 25.72 | 0.316 |
|               | Organic      | 3.161 | 3.691 | 0.015 | 2.843 | 1525  | 0.465 | 0.641 | 32.80 | 0.993 |
|               | Residual     | 0.933 | 1.678 | 0.006 | 4.206 | 1363  | 0.431 | 1.569 | 7.398 | 3.891 |

|       |              |       |       |       |       |       |       |       |       |       |
|-------|--------------|-------|-------|-------|-------|-------|-------|-------|-------|-------|
|       | Non-residual | 25.99 | 34.21 | 0.297 | 19.04 | 3133  | 2.103 | 2.229 | 370.3 | 1.778 |
|       | Total        | 26.92 | 35.89 | 0.303 | 23.25 | 4496  | 2.534 | 3.798 | 377.7 | 5.669 |
|       | ICF          | 27.85 | 20.38 | 53.68 | 4.527 | 2.299 | 4.878 | 1.420 | 50.05 | 0.457 |
| S25L2 | Exchangeable | 0.395 | 0.029 | 0.037 | 1.002 | 7.831 | 0.064 | 0.168 | 49.53 | 0.014 |
|       | Carbonate    | 2.889 | 4.466 | 0.063 | 8.726 | 340.7 | 0.852 | 1.143 | 97.34 | 0.307 |
|       | Fe-Mn oxide  | 1.780 | 4.852 | 0.015 | 8.145 | 1493  | 0.936 | 1.301 | 52.44 | 0.796 |
|       | Organic      | 5.560 | 10.26 | 0.024 | 2.963 | 1623  | 0.384 | 0.723 | 25.88 | 0.977 |
|       | Residual     | 1.242 | 1.531 | 0.007 | 5.156 | 1216  | 0.389 | 1.513 | 7.224 | 3.736 |
|       | Non-residual | 10.63 | 19.61 | 0.139 | 20.83 | 3465  | 2.236 | 3.335 | 225.2 | 2.093 |
|       | Total        | 11.87 | 21.14 | 0.146 | 25.99 | 4681  | 2.625 | 4.848 | 232.4 | 5.829 |
|       | ICF          | 8.551 | 12.80 | 19.74 | 4.041 | 2.849 | 5.753 | 2.204 | 31.17 | 0.560 |
| S31   | Exchangeable | 0.106 | 0.032 | 0.042 | 0.761 | 8.546 | 0.189 | 0.242 | 148.8 | 0.006 |
|       | Carbonate    | 1.348 | 1.926 | 0.053 | 4.324 | 230.3 | 1.077 | 1.555 | 84.75 | 0.539 |
|       | Fe-Mn oxide  | 0.683 | 3.469 | 0.016 | 4.967 | 2016  | 1.071 | 1.458 | 75.31 | 0.968 |
|       | Organic      | 5.018 | 6.317 | 0.018 | 2.831 | 1706  | 0.555 | 0.978 | 28.19 | 1.136 |
|       | Residual     | 1.441 | 2.364 | 0.014 | 4.254 | 1266  | 0.476 | 1.779 | 6.909 | 4.614 |
|       | Non-residual | 7.156 | 11.74 | 0.129 | 12.88 | 3960  | 2.893 | 4.233 | 337.0 | 2.649 |
|       | Total        | 8.598 | 14.11 | 0.144 | 17.14 | 5226  | 3.369 | 6.011 | 343.9 | 7.263 |
|       | ICF          | 4.964 | 4.967 | 9.044 | 3.028 | 3.129 | 6.083 | 2.379 | 48.78 | 0.574 |

**Table S2.** Contents of heavy metals in the sediment depth of 20 cm ( $\mu\text{g}\cdot\text{g}^{-1}$ )

| Sampling site | Fraction     | Cu    | Pb    | Cd    | Zn    | Fe    | Co    | Ni    | Mn    | Cr    |
|---------------|--------------|-------|-------|-------|-------|-------|-------|-------|-------|-------|
| S5            | Exchangeable | 0.141 | 0.067 | 0.052 | 0.436 | 7.861 | 0.063 | 0.091 | 129.1 | 0.003 |
|               | Carbonate    | 1.596 | 3.004 | 0.087 | 4.571 | 478.4 | 0.768 | 0.583 | 125.8 | 0.387 |
|               | Fe-Mn oxide  | 0.976 | 6.341 | 0.026 | 4.569 | 2633  | 1.071 | 0.777 | 102.1 | 0.882 |
|               | Organic      | 4.292 | 9.080 | 0.030 | 2.558 | 1610  | 0.514 | 0.589 | 31.39 | 1.056 |
|               | Residual     | 3.106 | 1.427 | 0.005 | 3.874 | 1471  | 0.438 | 1.599 | 10.07 | 4.573 |
|               | Non-residual | 7.005 | 18.49 | 0.195 | 12.13 | 4729  | 2.416 | 2.040 | 388.4 | 2.329 |
|               | Total        | 10.11 | 19.92 | 0.201 | 16.00 | 6200  | 2.854 | 3.640 | 398.4 | 6.902 |
|               | ICF          | 2.256 | 12.95 | 35.71 | 3.132 | 3.216 | 5.518 | 1.276 | 38.57 | 0.509 |
| S11           | Exchangeable | 0.026 | 0.055 | 0.017 | 0.500 | 7.979 | 0.185 | 0.119 | 128.1 | 0.001 |
|               | Carbonate    | 0.431 | 0.881 | 0.025 | 2.491 | 170.9 | 0.977 | 1.005 | 90.82 | 0.395 |
|               | Fe-Mn oxide  | 0.214 | 1.903 | 0.007 | 4.142 | 2135  | 0.521 | 0.644 | 56.39 | 0.631 |
|               | Organic      | 0.023 | 0.070 | 0.001 | 0.257 | 0.831 | 0.001 | 0.020 | 0.020 | 0.103 |
|               | Residual     | 1.315 | 0.053 |       |       |       |       | 0.105 |       | 0.039 |
|               | Non-residual | 0.694 | 2.909 | 0.049 | 7.390 | 2315  | 1.684 | 1.788 | 275.3 | 1.130 |
|               | Total        | 2.009 | 2.962 | 0.049 | 7.390 | 2315  | 1.684 | 1.893 | 275.3 | 1.168 |

|              |              |              |       |       |       |       |       |       |       |       |
|--------------|--------------|--------------|-------|-------|-------|-------|-------|-------|-------|-------|
| S15          | Exchangeable | 0.018        | 0.021 | 0.020 | 0.466 | 3.627 | 0.472 | 0.247 | 123.1 | 0.003 |
|              | Carbonate    | 0.162        | 0.413 | 0.013 | 1.008 | 81.11 | 0.668 | 0.641 | 49.70 | 0.188 |
|              | Fe-Mn oxide  | 0.122        | 0.428 | 0.003 | 2.136 | 754.3 | 0.348 | 0.378 | 83.69 | 0.327 |
|              | Organic      | 1.545        | 1.878 | 0.013 | 1.401 | 829.7 | 0.276 | 0.334 | 32.45 | 0.536 |
|              | Residual     | 0.361        | 0.711 | 0.002 | 1.514 | 551.3 | 0.147 | 0.458 | 3.421 | 1.455 |
|              | Non-residual | 1.847        | 2.739 | 0.049 | 5.012 | 1669  | 1.764 | 1.601 | 288.9 | 1.053 |
|              | Total        | 2.208        | 3.450 | 0.051 | 6.526 | 2220  | 1.911 | 2.059 | 292.3 | 2.508 |
|              | ICF          | 5.117        | 3.854 | 24.24 | 3.309 | 3.027 | 11.97 | 3.491 | 84.45 | 0.724 |
| S22          | Exchangeable | 2.367        | 0.131 | 0.079 | 0.832 | 13.29 | 0.027 | 0.192 | 36.90 | 0.042 |
|              | Carbonate    | 7.865        | 13.35 | 0.096 | 7.132 | 592.4 | 0.695 | 0.598 | 121.6 | 0.281 |
|              | Fe-Mn oxide  | 5.789        | 17.94 | 0.036 | 12.16 | 2033  | 1.578 | 1.367 | 107.6 | 0.763 |
|              | Residual     | 1.885        | 2.157 | 0.007 | 3.483 | 1383  | 0.341 | 1.334 | 11.04 | 3.191 |
|              | Non-residual | 16.02        | 31.42 | 0.210 | 20.12 | 2639  | 2.300 | 2.157 | 266.2 | 1.085 |
|              | Total        | 17.90        | 33.58 | 0.217 | 23.60 | 4022  | 2.642 | 3.491 | 277.2 | 4.276 |
|              | ICF          | 8.499        | 14.57 | 31.16 | 5.777 | 1.909 | 6.742 | 1.617 | 24.11 | 0.340 |
|              | S25 L2       | Exchangeable | 0.265 | 0.092 | 0.036 | 0.764 | 13.27 | 0.050 | 0.151 | 38.37 |
| Carbonate    |              | 1.419        | 2.545 | 0.042 | 5.491 | 292.7 | 0.913 | 1.148 | 97.72 | 0.329 |
| Residual     |              | 0.847        | 1.231 | 0.009 | 66.35 | 957.8 | 0.301 | 1.037 | 6.315 | 2.650 |
| Non-residual |              | 1.684        | 2.637 | 0.077 | 6.255 | 306.0 | 0.963 | 1.300 | 136.1 | 0.358 |
| Total        |              | 2.531        | 3.868 | 0.086 | 72.61 | 1264  | 1.264 | 2.337 | 142.4 | 3.007 |
| ICF          |              | 1.990        | 2.141 | 8.652 | 0.094 | 0.319 | 3.199 | 1.253 | 21.55 | 0.135 |
| S31          |              | Exchangeable | 0.053 | 0.048 | 0.031 | 0.548 | 4.296 | 0.202 | 0.177 | 98.58 |
|              | Carbonate    | 0.857        | 1.533 | 0.046 | 3.572 | 154.3 | 1.057 | 1.335 | 64.44 | 0.581 |
|              | Fe-Mn oxide  | 4.878        | 4.729 | 0.015 | 3.063 | 1702  | 0.566 | 0.891 | 40.02 | 1.454 |
|              | Residual     | 1.063        | 1.184 | 0.007 | 3.086 | 1268  | 0.465 | 1.775 | 7.679 | 4.618 |
|              | Non-residual | 5.788        | 6.310 | 0.091 | 7.183 | 1861  | 1.825 | 2.403 | 203.0 | 2.048 |
|              | Total        | 6.851        | 7.495 | 0.098 | 10.27 | 3129  | 2.290 | 4.178 | 210.7 | 6.666 |
|              | ICF          | 5.446        | 5.328 | 12.97 | 2.328 | 1.467 | 3.927 | 1.354 | 26.44 | 0.444 |

**Table S3.** Contents of heavy metals in the sediment depth of 30 cm ( $\mu\text{g}\cdot\text{g}^{-1}$ )

| Sampling site | Fraction     | Cu    | Pb    | Cd    | Zn    | Fe    | Co    | Ni    | Mn    | Cr    |
|---------------|--------------|-------|-------|-------|-------|-------|-------|-------|-------|-------|
| S5            | Exchangeable | 0.125 | 0.085 | 0.062 | 0.351 | 5.956 | 0.066 | 0.087 | 121.1 | 0.012 |
|               | Carbonate    | 1.354 | 3.604 | 0.094 | 4.690 | 463.5 | 0.815 | 0.797 | 112.1 | 0.528 |
|               | Fe-Mn oxide  | 0.956 | 6.617 | 0.030 | 4.850 | 2484  | 1.145 | 0.883 | 75.69 | 0.965 |
|               | Residual     | 1.489 | 1.723 | 0.003 | 4.690 | 1430  | 0.492 | 1.869 | 9.636 | 4.569 |

|        |              |       |       |       |       |       |       |       |       |       |
|--------|--------------|-------|-------|-------|-------|-------|-------|-------|-------|-------|
|        | Non-residual | 2.435 | 10.31 | 0.186 | 9.891 | 2953  | 2.027 | 1.767 | 308.9 | 1.505 |
|        | Total        | 3.924 | 12.03 | 0.189 | 14.58 | 4384  | 2.519 | 3.635 | 318.5 | 6.074 |
|        | ICF          | 1.635 | 5.981 | 59.20 | 2.109 | 2.065 | 4.121 | 0.945 | 32.06 | 0.329 |
| S11    | Exchangeable | 0.034 | 0.083 | 0.023 | 0.622 | 5.111 | 0.219 | 0.131 | 176.3 | 0.035 |
|        | Carbonate    | 0.363 | 1.009 | 0.028 | 2.411 | 164.6 | 0.996 | 0.940 | 110.5 | 0.479 |
|        | Fe-Mn oxide  | 0.299 | 2.232 | 0.010 | 2.785 | 2388  | 0.635 | 0.760 | 68.94 | 0.947 |
|        | Organic      | 4.029 | 5.528 | 0.018 | 2.821 | 2234  | 0.456 | 0.697 | 26.41 | 1.172 |
|        | Residual     | 0.669 | 2.841 | 0.027 | 2.794 | 875.4 | 0.302 | 1.201 | 4.58  | 3.330 |
|        | Non-residual | 4.726 | 8.853 | 0.079 | 8.640 | 4792  | 2.307 | 2.528 | 382.2 | 2.634 |
|        | Total        | 5.395 | 11.69 | 0.106 | 11.43 | 5667  | 2.608 | 3.729 | 386.7 | 5.964 |
|        | ICF          | 7.060 | 3.116 | 2.917 | 3.092 | 5.474 | 7.645 | 2.104 | 83.44 | 0.791 |
| S15    | Exchangeable | 0.029 | 0.069 | 0.018 | 0.663 | 5.59  | 0.304 | 0.160 | 56.01 | 0.018 |
|        | Carbonate    | 0.314 | 0.832 | 0.037 | 2.375 | 91.96 | 0.760 | 0.684 | 23.32 | 0.343 |
|        | Organic      | 2.221 | 2.384 | 0.017 | 2.218 | 1039  | 0.391 | 0.437 | 12.18 | 0.763 |
|        | Residual     | 0.379 | 0.956 |       | 1.204 | 679.7 | 0.192 | 0.566 | 4.117 | 1.762 |
|        | Non-residual | 2.563 | 3.286 | 0.071 | 5.256 | 1136  | 1.454 | 1.281 | 91.50 | 1.124 |
|        | Total        | 2.942 | 4.241 | 0.071 | 6.461 | 1816  | 1.647 | 1.846 | 95.62 | 2.886 |
|        | ICF          | 6.768 | 3.438 |       | 4.365 | 1.672 | 7.559 | 2.263 | 22.22 | 0.638 |
| S22    | Exchangeable | 1.594 | 0.107 | 0.060 | 0.623 | 12.87 | 0.026 | 0.763 | 41.74 | 0.023 |
|        | Carbonate    | 5.247 | 10.51 | 0.071 | 5.142 | 643.2 | 0.636 | 0.633 | 112.9 | 0.239 |
|        | Fe-Mn oxide  | 2.951 | 6.060 | 0.013 | 6.804 | 1139  | 0.992 | 0.857 | 41.55 | 0.469 |
|        | Organic      | 3.916 | 4.391 | 0.018 | 2.412 | 567.8 | 0.313 | 0.464 | 11.50 | 0.469 |
|        | Residual     | 0.871 | 1.887 | 0.003 | 2.101 | 910.4 | 0.266 | 0.897 | 7.912 | 2.409 |
|        | Non-residual | 13.71 | 21.07 | 0.161 | 14.98 | 2363  | 1.966 | 2.718 | 207.7 | 1.199 |
|        | Total        | 14.58 | 22.96 | 0.164 | 17.08 | 3273  | 2.232 | 3.615 | 215.6 | 3.608 |
|        | ICF          | 15.73 | 11.16 | 54.35 | 7.131 | 2.595 | 7.391 | 3.030 | 26.25 | 0.498 |
| S25 L2 | Exchangeable | 0.210 | 0.045 | 0.029 | 0.417 | 8.654 | 0.070 | 0.115 | 56.40 | 0.014 |
|        | Carbonate    | 2.219 | 3.925 | 0.057 | 6.126 | 383.4 | 0.973 | 0.944 | 103.2 | 0.286 |
|        | Fe-Mn oxide  | 1.251 | 5.779 | 0.019 | 14.91 | 1613  | 0.880 | 1.078 | 63.12 | 0.670 |
|        | Organic      | 5.497 | 11.55 | 0.024 | 4.145 | 1698  | 0.404 | 0.657 | 31.98 | 0.780 |
|        | Residual     | 0.812 | 1.084 | 0.004 | 2.386 | 959.9 | 0.302 | 1.094 | 5.289 | 2.847 |
|        | Non-residual | 9.177 | 21.30 | 0.130 | 25.59 | 3703  | 2.328 | 2.795 | 254.7 | 1.749 |
|        | Total        | 9.989 | 22.39 | 0.133 | 27.98 | 4663  | 2.630 | 3.889 | 259.9 | 4.597 |
|        | ICF          | 11.31 | 19.65 | 34.57 | 10.73 | 3.858 | 7.703 | 2.553 | 48.15 | 0.614 |
| S31    | Exchangeable | 0.038 | 0.016 | 0.024 | 0.620 | 9.198 | 0.221 | 0.175 | 104.7 | 0.013 |
|        | Carbonate    | 0.623 | 0.940 | 0.038 | 3.168 | 125.6 | 0.994 | 1.196 | 66.42 | 0.466 |
|        | Fe-Mn oxide  | 0.342 | 1.855 | 0.012 | 3.074 | 2022  | 0.723 | 0.838 | 106.5 | 0.714 |
|        | Organic      | 4.039 | 4.885 | 0.013 | 2.178 | 1705  | 0.447 | 0.675 | 45.32 | 0.929 |
|        | Residual     | 0.750 | 1.092 | 0.008 | 2.061 | 878.4 | 0.307 | 1.088 | 5.666 | 3.247 |

|              |       |       |       |       |       |       |       |       |       |
|--------------|-------|-------|-------|-------|-------|-------|-------|-------|-------|
| Non-residual | 5.042 | 7.696 | 0.086 | 9.040 | 3862  | 2.385 | 2.884 | 322.9 | 2.121 |
| Total        | 5.792 | 8.788 | 0.093 | 11.10 | 4741  | 2.692 | 3.972 | 328.5 | 5.367 |
| ICF          | 6.719 | 7.049 | 11.44 | 4.387 | 4.397 | 7.760 | 2.651 | 56.98 | 0.653 |

**Table S4.** Contents of heavy metals in the sediment depth of 40 cm ( $\mu\text{g}\cdot\text{g}^{-1}$ )

| Sampling site | Fraction     | Cu           | Pb    | Cd    | Zn    | Fe    | Co    | Ni    | Mn    | Cr    |
|---------------|--------------|--------------|-------|-------|-------|-------|-------|-------|-------|-------|
| S11           | Exchangeable | 0.026        | 0.270 | 0.039 | 0.692 | 7.774 | 0.231 | 0.305 | 118.1 | 0.024 |
|               | Carbonate    | 0.403        | 1.669 | 0.034 | 3.125 | 149.8 | 1.183 | 1.096 | 80.76 | 0.524 |
|               | Fe-Mn oxide  | 0.229        | 2.624 | 0.011 | 12.14 | 2101  | 0.768 | 0.958 | 55.48 | 1.053 |
|               | Organic      | 4.131        | 5.706 | 0.018 | 3.892 | 1748  | 0.455 | 0.776 | 19.38 | 1.205 |
|               | Residual     | 1.007        | 2.099 | 0.025 | 7.319 | 1053  | 0.341 | 1.320 | 4.614 | 3.744 |
|               | Non-residual | 4.788        | 10.27 | 0.102 | 19.85 | 4007  | 2.637 | 3.134 | 273.8 | 2.806 |
|               | Total        | 5.796        | 12.37 | 0.126 | 27.17 | 5060  | 2.978 | 4.454 | 278.4 | 6.550 |
|               | ICF          | 4.753        | 4.893 | 4.129 | 2.712 | 3.806 | 7.733 | 2.375 | 59.33 | 0.749 |
| S15           | Exchangeable | 0.012        | 0.032 | 0.024 | 0.784 | 3.983 | 0.315 | 0.241 | 61.01 | 0.009 |
|               | Carbonate    | 0.248        | 0.406 | 0.023 | 2.437 | 80.68 | 0.822 | 1.027 | 25.71 | 0.288 |
|               | Fe-Mn oxide  | 0.130        | 0.512 | 0.007 | 3.880 | 1124  | 0.743 | 0.805 | 28.20 | 0.688 |
|               | Organic      | 2.023        | 1.694 | 0.013 | 2.200 | 1044  | 0.453 | 0.634 | 12.12 | 0.702 |
|               | Residual     | 0.530        | 2.403 | 0.086 | 1.654 | 863.7 | 0.248 | 0.711 | 4.520 | 2.159 |
|               | Non-residual | 2.413        | 2.644 | 0.068 | 9.301 | 2253  | 2.333 | 2.708 | 127.1 | 1.687 |
|               | Total        | 2.943        | 5.046 | 0.154 | 10.96 | 3117  | 2.582 | 3.419 | 131.6 | 3.846 |
|               | ICF          | 4.556        | 1.100 | 0.792 | 5.624 | 2.608 | 9.402 | 3.808 | 28.12 | 0.781 |
| S22           | Exchangeable | 0.060        | 0.004 | 0.011 | 0.599 | 3.667 | 0.160 | 0.136 | 153.1 | 0.027 |
|               | Fe-Mn oxide  | 0.412        | 1.784 | 0.005 | 3.743 | 2183  | 0.720 | 0.821 | 91.45 | 0.718 |
|               | Organic      | 3.716        | 7.650 | 0.023 | 2.115 | 1353  | 0.454 | 0.550 | 20.35 | 0.972 |
|               | Residual     | 0.630        | 0.871 | 0.007 | 2.439 | 957.8 | 0.351 | 1.080 | 6.351 | 3.086 |
|               | Non-residual | 4.189        | 9.439 | 0.039 | 6.457 | 3539  | 1.333 | 1.507 | 264.9 | 1.718 |
|               | Total        | 4.819        | 10.31 | 0.046 | 8.897 | 4497  | 1.685 | 2.587 | 271.2 | 4.804 |
|               | ICF          | 6.649        | 10.83 | 5.832 | 2.647 | 3.695 | 3.795 | 1.395 | 41.71 | 0.557 |
|               | S25 L2       | Exchangeable | 0.052 | 0.002 | 0.038 | 0.960 | 11.59 | 0.169 | 0.223 | 48.24 |
| Carbonate     |              | 0.337        | 1.050 | 0.100 | 10.35 | 218.2 | 1.878 | 1.526 | 48.86 | 0.450 |
| Fe-Mn oxide   |              | 0.187        | 1.625 | 0.030 | 8.955 | 1855  | 1.341 | 1.413 | 83.12 | 0.775 |
| Organic       |              | 4.186        | 5.663 | 0.030 | 5.266 | 2095  | 0.779 | 1.292 | 86.63 | 1.366 |
| Residual      |              | 1.108        | 1.244 | 0.005 | 3.716 | 1497  | 0.526 | 1.706 | 8.057 | 5.169 |
| Non-residual  |              | 4.762        | 8.339 | 0.198 | 25.54 | 4179  | 4.166 | 4.454 | 266.8 | 2.612 |
| Total         |              | 5.870        | 9.583 | 0.203 | 29.25 | 5676  | 4.692 | 6.160 | 274.9 | 7.781 |

|     |              |       |       |       |       |       |       |       |       |       |
|-----|--------------|-------|-------|-------|-------|-------|-------|-------|-------|-------|
|     | ICF          | 4.298 | 6.702 | 36.29 | 6.873 | 2.791 | 7.920 | 2.611 | 33.12 | 0.505 |
| S31 | Exchangeable | 0.052 | 0.043 | 0.029 | 1.341 | 7.487 | 0.195 | 0.196 | 64.45 | 0.024 |
|     | Carbonate    | 0.844 | 1.185 | 0.037 | 3.330 | 137.4 | 1.000 | 1.317 | 42.99 | 0.490 |
|     | Fe-Mn oxide  | 0.416 | 1.952 | 0.010 | 3.508 | 2000  | 0.826 | 0.949 | 84.27 | 0.813 |
|     | Organic      | 3.834 | 4.010 | 0.018 | 2.282 | 1438  | 0.428 | 0.656 | 28.23 | 0.933 |
|     | Residual     | 0.834 | 0.846 | 0.005 | 2.548 | 1161  | 0.374 | 1.328 | 6.995 | 3.995 |
|     | Non-residual | 5.146 | 7.191 | 0.093 | 10.46 | 3583  | 2.448 | 3.118 | 219.9 | 2.260 |
|     | Total        | 5.980 | 8.037 | 0.099 | 13.01 | 4744  | 2.821 | 4.447 | 226.9 | 6.255 |
|     | ICF          | 6.174 | 8.496 | 17.96 | 4.106 | 3.086 | 6.553 | 2.348 | 31.44 | 0.566 |

**Table S5.** Concentrations of heavy metals in pore water in different depths ( $\mu\text{g}\cdot\text{L}^{-1}$ )

| Depth | Sampling site | Cu    | Pb    | Cd    | Zn    | Fe    | Co    | Ni    | Mn     | Cr    |
|-------|---------------|-------|-------|-------|-------|-------|-------|-------|--------|-------|
| 10 cm | S5            | 56.14 | 8.879 | 0.425 | 107.4 | 5827  | 2.558 | 9.390 | 237.9  | 3.470 |
|       | S11           | 57.44 | 14.26 | 0.414 | 208.0 | 1647  | 0.820 | 9.516 | 114.4  | 4.413 |
|       | S15           | 20.10 | 15.58 | 0.786 | 44.05 | 419.6 | 0.724 | 22.70 | 315.5  | 2.863 |
|       | S22           | 13.04 | 9.238 | 0.050 | 49.20 | 2719  | 0.311 | 2.524 | 367.6  | 0.130 |
|       | S25L2         | 12.31 | 6.920 | 0.099 | 19.34 | 2862  | 1.382 | 2.721 | 620.8  | 0.110 |
|       | S31           | 26.15 | 23.75 | 1.059 | 72.94 | 1286  | 2.320 | 10.11 | 606.7  | 1.548 |
| 20 cm | S5            | 59.20 | 13.05 | 0.372 | 157.0 | 8170  | 2.986 | 7.854 | 387.7  | 2.814 |
|       | S11           | 53.98 | 7.238 | 0.106 | 111.6 | 2823  | 1.125 | 7.071 | 341.86 | 2.135 |
|       | S15           | 18.99 | 4.046 | 0.083 | 39.54 | 665.3 | 0.915 | 14.01 | 292.3  | 2.062 |
|       | S22           | 12.42 | 5.941 | 0.132 | 36.24 | 1515  | 0.631 | 3.615 | 598.6  | 0.801 |
|       | S25L2         | 18.54 | 5.026 | 0.029 | 32.10 | 1267  | 1.006 | 4.587 | 445.5  | 0.264 |
|       | S31           | 42.60 | 20.64 | 0.902 | 90.11 | 501.3 | 0.656 | 9.106 | 56.65  | 1.657 |
| 30 cm | S5            | 72.52 | 11.91 | 0.553 | 203.4 | 13621 | 2.971 | 12.22 | 640.3  | 4.797 |
|       | S11           | 62.19 | 8.382 | 0.213 | 84.39 | 5222  | 1.913 | 8.137 | 426.9  | 2.263 |
|       | S15           | 21.21 | 29.74 | 1.762 | 58.08 | 469.1 | 0.629 | 23.29 | 151.6  | 3.318 |
|       | S22           | 5.417 | 0.975 | 0.025 | 21.08 | 106.8 | 0.471 | 2.874 | 376.5  | 0.411 |
|       | S25L2         | 29.27 | 6.076 | 0.161 | 85.28 | 639.7 | 0.597 | 6.004 | 121.1  | 1.949 |
|       | S31           | 22.09 | 7.229 | 0.265 | 39.66 | 687.7 | 0.675 | 4.154 | 150.8  | 1.260 |

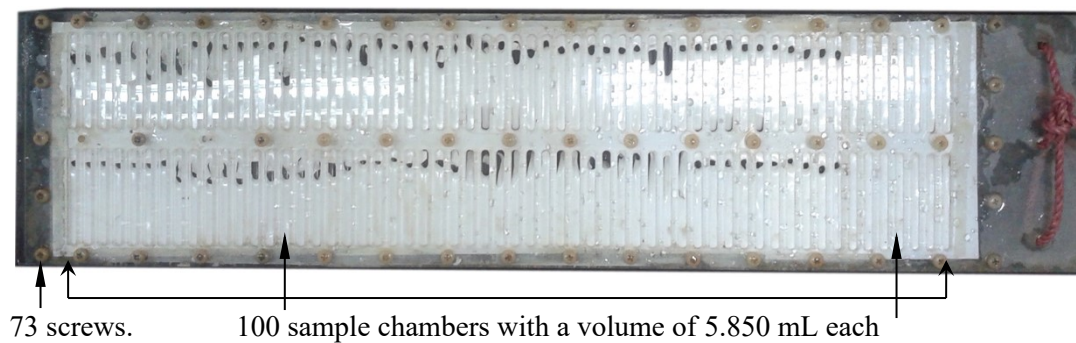

**Figure S1.** Sampling device for collecting pore water samples (peeper)

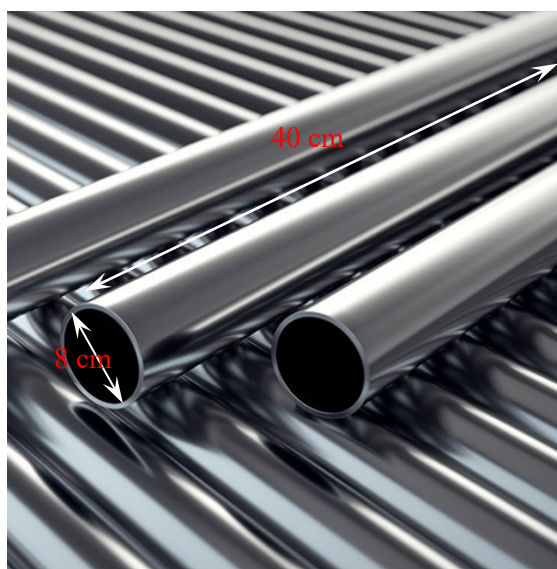

**Manmade core sampler**

Hold the device in an upright position and press

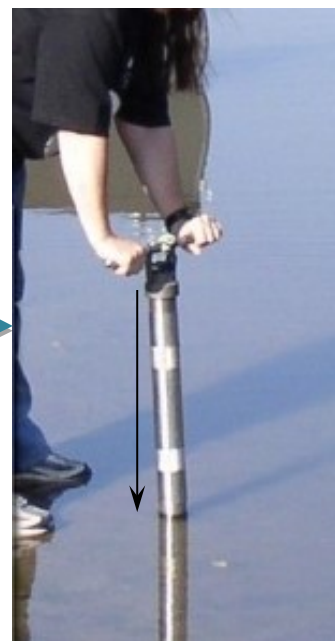

**Sample collection**

**Figure S2.** Sampling device for collecting sediment core samples
